# Supplementary material for: Ferulic acid attenuates high glucose-induced apoptosis in retinal pigment epithelium cells and protects retina in db/db mice
Source: PeerJ journal article supplement (doi:10.7717/peerj.13375), 2022-05-31
Supplement: Original_data.zip [file Original_data.zip]

## Sheet: Sheet1
	Bax	Control	3846.83	19357.6	0.198724
		Control	3834.78	19751.3	0.194153
		Control	4191.07	19846.6	0.211173
		Control	3462.55	19426.4	0.17824
		Control	3841.92	19568.6	0.196331
		Control	4471.17	19754.9	0.226333
		Control	3549.02	19035.6	0.186441
		Control	3863.55	19754.5	0.195579
		Control	3730.22	19886.5	0.187575
		Model	8754.92	19357.6	0.452272
		Model	9093.38	19751.3	0.460394
		Model	9692.82	19846.6	0.488386
		Model	8969.41	19426.4	0.461714
		Model	9984.54	19568.6	0.510234
		Model	10142.4	19754.9	0.513411
		Model	9786.46	19035.6	0.514113
		Model	8980.97	19754.5	0.45463
		Model	10444.1	19886.5	0.525186
		FA	7470.1	19357.6	0.3859
		FA	6710.05	19751.3	0.339727
		FA	7649.1	19846.6	0.385411
		FA	6524.52	19426.4	0.335859
		FA	7106.87	19568.6	0.363178
		FA	6896.64	19754.9	0.349111
		FA	6774.68	19035.6	0.355894
		FA	6327.28	19754.5	0.320296
		FA	7132.18	19886.5	0.358644
	Bcl-2	Control	7059.26	19357.6	0.364676
		Control	6972.09	19751.3	0.352994
		Control	7960.98	19846.6	0.401125
		Control	8820.08	19426.4	0.454026
		Control	7942.08	19568.6	0.405859
		Control	7134.27	19754.9	0.36114
		Control	6673.03	19035.6	0.350555
		Control	7297.07	19754.5	0.369389
		Control	7287.41	19886.5	0.366449
		Model	2896.3	19357.6	0.149621
		Model	3104.81	19751.3	0.157195
		Model	3199.17	19846.6	0.161194
		Model	2758.41	19426.4	0.141993
		Model	2456.55	19568.6	0.125535
		Model	3383.05	19754.9	0.171251
		Model	2895.67	19035.6	0.152118
		Model	3546.25	19754.5	0.179517
		Model	3093.81	19886.5	0.155573
		FA	5876.2	19357.6	0.30356
		FA	5125.92	19751.3	0.259523
		FA	4781.97	19846.6	0.240946
		FA	4535.6	19426.4	0.233477
		FA	5000.24	19568.6	0.255524
		FA	4905.67	19754.9	0.248327
		FA	4419.61	19035.6	0.232176
		FA	5379.08	19754.5	0.272297
		FA	5070.6	19886.5	0.254976
	Cleaved Caspase3	Control	3119.35	19357.6	0.161143
		Control	2981.07	19751.3	0.150931
		Control	2716.06	19846.6	0.136853
		Control	2520.1	19426.4	0.129726
		Control	2664.17	19568.6	0.136145
		Control	2927.24	19754.9	0.148178
		Control	2766.02	19035.6	0.145307
		Control	3066.14	19754.5	0.155213
		Control	2910.91	19886.5	0.146376
		Model	10480.5	19357.6	0.541417
		Model	10141.7	19751.3	0.513473
		Model	8299.1	19846.6	0.418162
		Model	9894.61	19426.4	0.509339
		Model	8621.82	19568.6	0.440596
		Model	9738.03	19754.9	0.492943
		Model	9311.44	19035.6	0.489158
		Model	9009.93	19754.5	0.456096
		Model	9824.3	19886.5	0.494018
		FA	6036.54	19357.6	0.311843
		FA	5725.51	19751.3	0.28988
		FA	6370.36	19846.6	0.320979
		FA	5987.48	19426.4	0.308214
		FA	5672.58	19568.6	0.289883
		FA	5151.7	19754.9	0.260781
		FA	6223.27	19035.6	0.326927
		FA	5824.51	19754.5	0.294846
		FA	6603.11	19886.5	0.332039
	p53	Control	4057.43	19357.6	0.209604
		Control	3813.66	19751.3	0.193084
		Control	3929.49	19846.6	0.197993
		Control	4184.72	19426.4	0.215414
		Control	4051.22	19568.6	0.207027
		Control	3617.02	19754.9	0.183095
		Control	3931.85	19035.6	0.206552
		Control	3932.68	19754.5	0.199078
		Control	4397.02	19886.5	0.221105
		Model	14584.6	19357.6	0.753432
		Model	15911.7	19751.3	0.805604
		Model	16236.1	19846.6	0.818077
		Model	14491.7	19426.4	0.745983
		Model	14148.8	19568.6	0.72304
		Model	15189	19754.9	0.768875
		Model	14270.8	19035.6	0.74969
		Model	16769.4	19754.5	0.848893
		Model	14095.3	19886.5	0.708785
		FA	7839.52	19357.6	0.404983
		FA	8512.44	19751.3	0.430981
		FA	7304.61	19846.6	0.368053
		FA	8633.18	19426.4	0.444406
		FA	7691.72	19568.6	0.393065
		FA	8004.18	19754.9	0.405175
		FA	8452.57	19035.6	0.444039
		FA	8280.35	19754.5	0.419164
		FA	7909.1	19886.5	0.397711
